# Supplementary material for: Synthesis of Ag@Fe3O4 Nanoparticles for Photothermal Treatment of Ovarian Cancer
Source: Hindawi journal article supplement (doi:10.1155/2019/6457968), 2019-01-28
Supplement: f1 [file 6457968.f1.docx]

**Supplementary Figure 1**


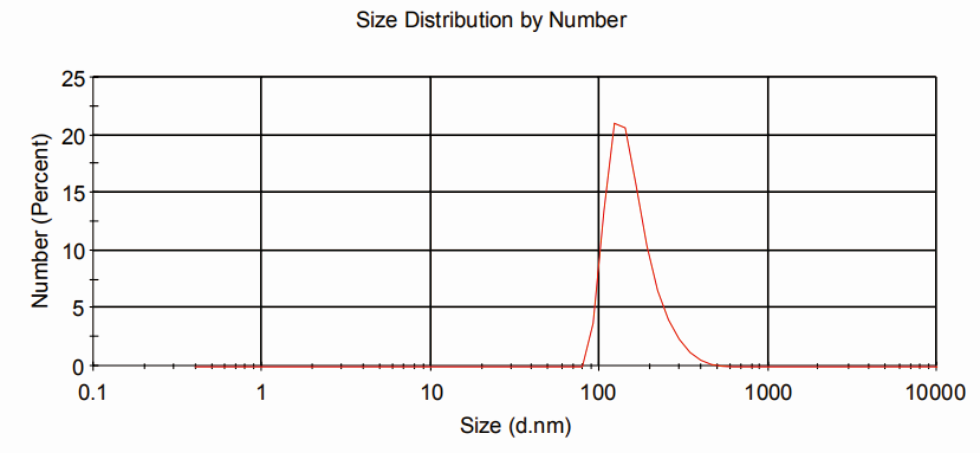


**Supplementary Figure 1:** The size and size distribution of the Ag@Fe3O4 nanoparticles measured by DLS.

**Supplementary Figure 2**


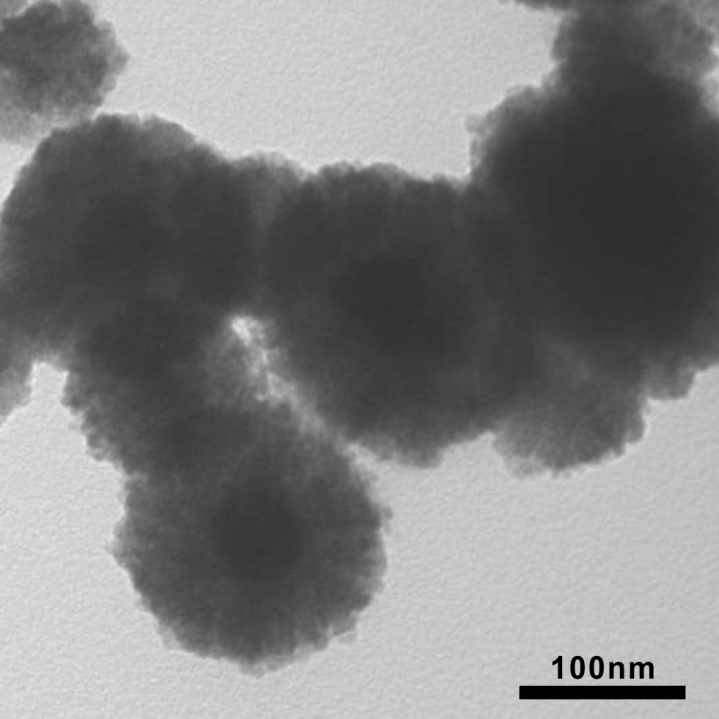


**Supplementary Figure 2:** TEM images of the Ag@Fe3O4 nanoparticles after irradiatting with an 808 nm light laser for 15 min at 5.0 W /cm2.
